# Supplementary material for: Enhanced thermal degradation stability of the Sr2Si5N8:Eu2+ phosphor by ultra-thin Al2O3 coating through the atomic layer deposition technique in a fluidized bed reactor
Source: Royal Society of Chemistry journal article supplement (doi:10.1039/c9tc01063g), 2019-01-01
Supplement: c9tc01063g1.pdf [file c9tc01063g1.pdf]

## Electronic Supplementary Information

### Enhanced thermal degradation stability of $\text{Sr}_2\text{Si}_5\text{N}_8:\text{Eu}^{2+}$ phosphor by ultra-thin $\text{Al}_2\text{O}_3$ coating through Atomic Layer Deposition technique in a Fluidized Bed reactor

Yujie-Zhao<sup>a,b</sup>, Liangjun-Yin<sup>b,c</sup>, O.M. ten Kate<sup>b</sup>, Benjamin Dierre<sup>d</sup>, Ruben Abellon<sup>b</sup>, Rongjun-Xie<sup>a\*</sup>, J. Ruud van Ommen<sup>b</sup>, H.T. Hintzen<sup>d</sup>

<sup>a</sup>College of Materials, Xiamen University, 361005, Xiamen, P.R. China

<sup>b</sup>Department of Chemical Engineering, Faculty of Applied Sciences, Delft University of Technology, 2629 HZ Delft, The Netherlands

<sup>c</sup>School of Energy Science and Engineering, University of Electronic Science and Technology of China, 61000, Chengdu, P.R. China

<sup>d</sup>Fundamental Aspects of Materials and Energy, Faculty of Applied Sciences, Delft University of Technology, 2629 JB Delft, The Netherlands

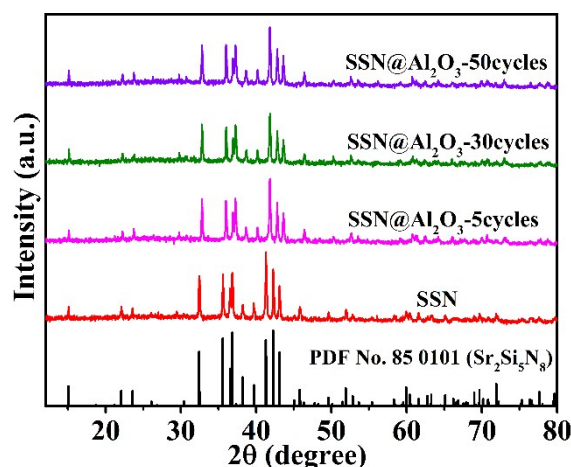

Fig. S1 XRD patterns of SSN@Al<sub>2</sub>O<sub>3</sub>@100°C with different number of cycles.

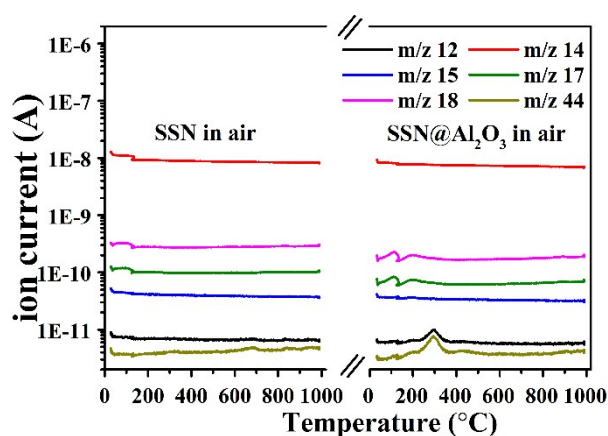

Fig. S2 TGA/MS of SSN and SSN@Al<sub>2</sub>O<sub>3</sub>@30°C. Species with different ratios of mass to charge (m/z) appear within the temperature range. H<sub>2</sub>O and OH groups are confirmed by the m/z 18 and 17. Carbon and carbon dioxide are determined by the m/z 12 and 44.

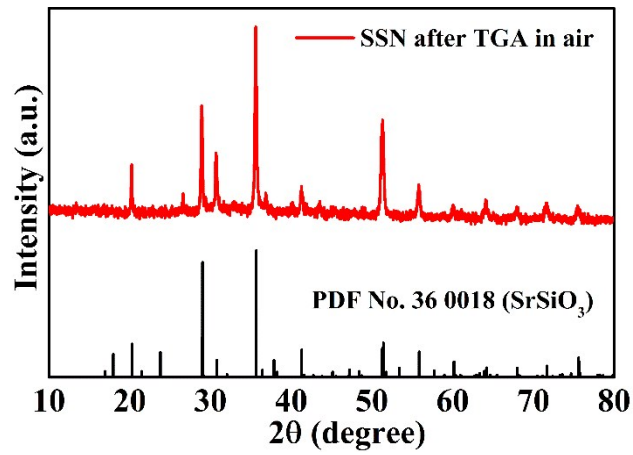

Fig. S3 XRD pattern of SSN after TGA measurement in air.  $\text{SrSiO}_3$  is formed.

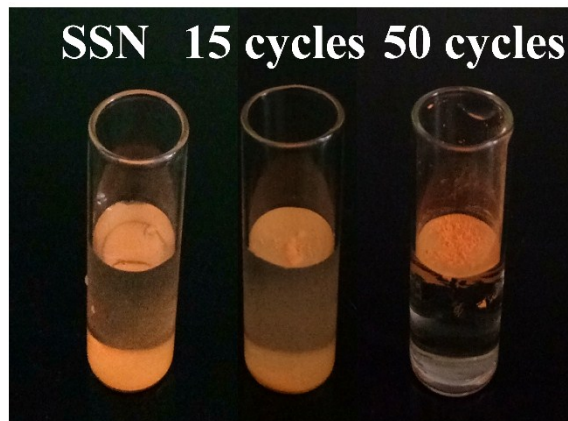

Fig. S4 Photograph of SSN and  $\text{SSN@Al}_2\text{O}_3@100^\circ\text{C}$  with different number cycles in water.

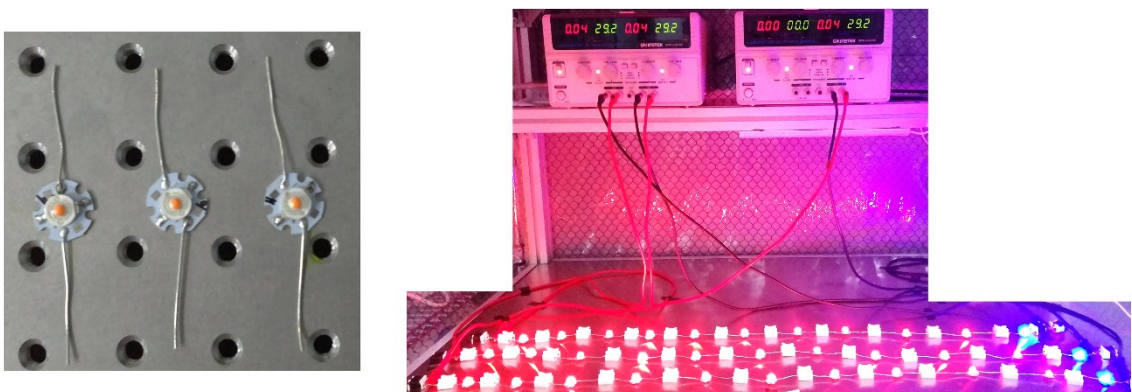

Fig. S5 Photographs of the fabricated LEDs and the aging test.
